# Supplementary material for: A multi-classifier system integrated by clinico-histology-genomic analysis for predicting recurrence of papillary renal cell carcinoma
Source: PubMed Central journal article supplement (PMC11266571; doi:10.1038/s41467-024-50369-y), 2024-07-23
Supplement: 41467_2024_50369_MOESM1_ESM.pdf [file 41467_2024_50369_MOESM1_ESM.pdf]

**Supplementary Information**

**A multi-classifier system integrated by clinico-histology-genomic analysis for  
predicting recurrence of papillary renal cell carcinoma**

**Huang et al.**

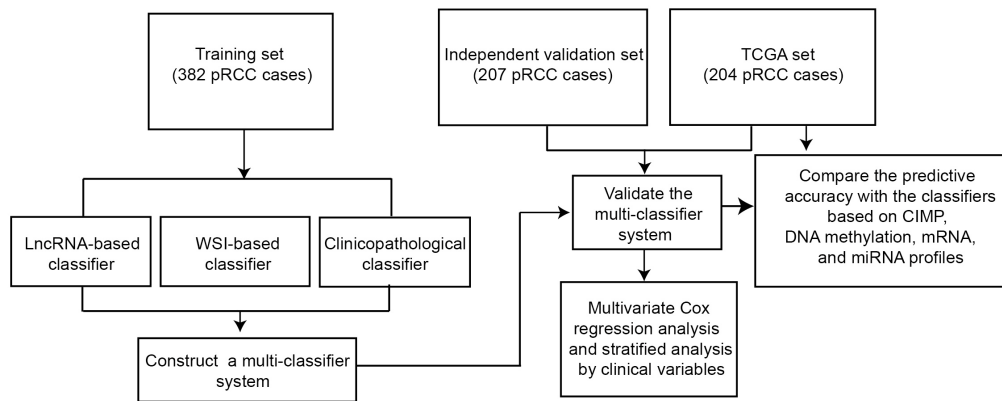

**Supplementary Fig. 1 Study design.** pRCC = papillary renal cell carcinoma; TCGA = The Cancer Genome Atlas; CIMP = CpG island methylator phenotype.

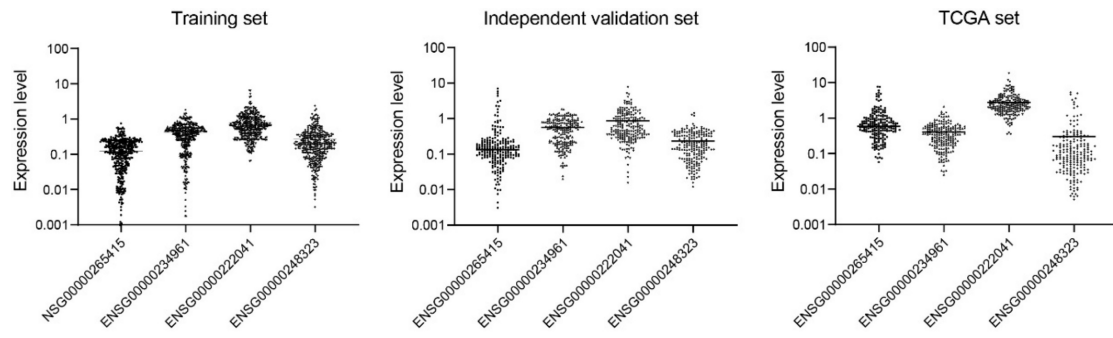

**Supplementary Fig. 2** Scatter dot plot depicting the expression of the four lncRNAs in the three different sets. The expression levels of the four lncRNAs in the training set and independent validation set were represented by  $2^{-\Delta C_t}$ . For the TCGA set, lncRNA levels were represented by RPKM. Source data are provided as a Source Data file.

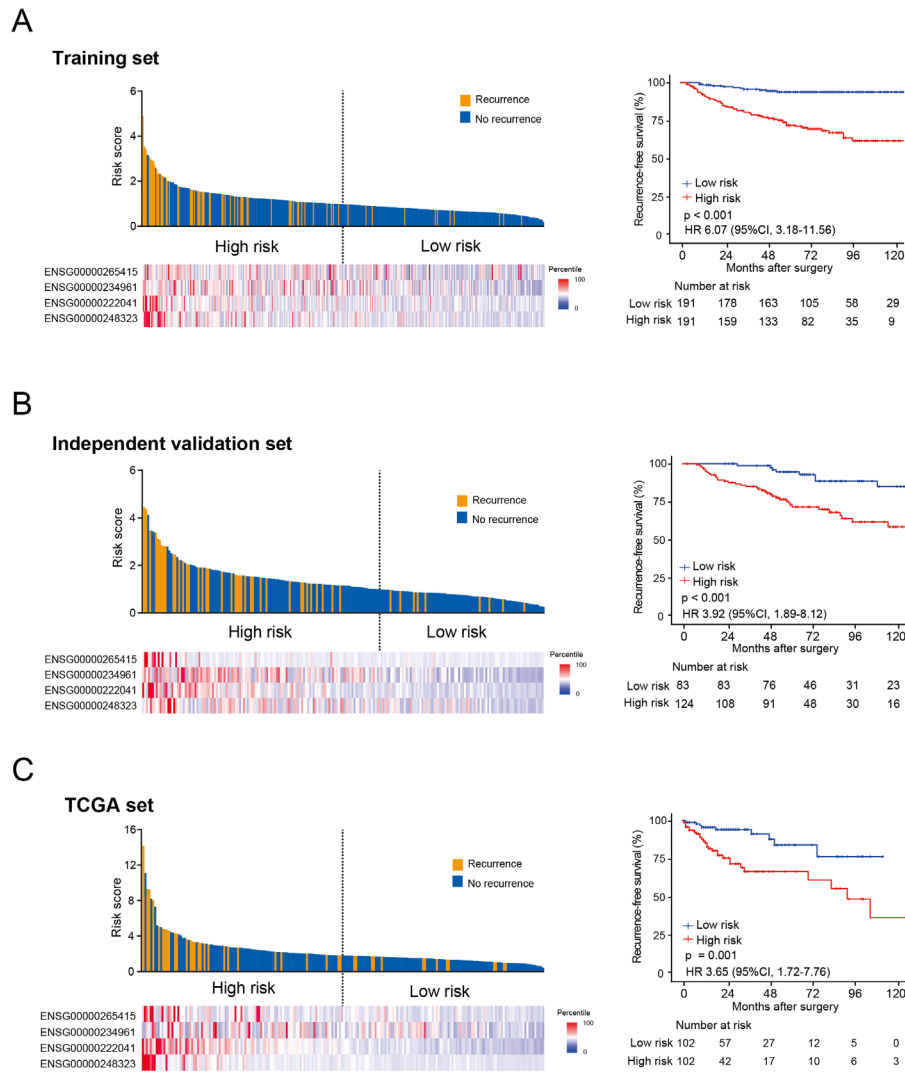

**Supplementary Fig. 3 The risk score calculated by the lncRNA-based classifier and Kaplan-Meier survival for RFS in the three different sets. (A)** The risk score calculated by the lncRNA-based classifier and Kaplan-Meier survival in the training set. Upper left of panel: risk-score distribution of the lncRNA-based classifier and patient progression status. Patients in the training set were divided into high-risk and low-risk groups, with the median risk score (0.9800) as the cutoff. Lower left of panel: heatmap shows the expression level of four lncRNAs. Right of panel: Kaplan-Meier survival analysis for RFS in pRCC patients who were divided into low-risk and high-risk groups according to four-lncRNA-based risk score. **(B, C)** illustrates the risk score calculated by the lncRNA-based classifier and Kaplan-Meier survival in the independent validation set and TCGA set, respectively. Risk score for each patient in the independent validation set and the TCGA set was calculated with the same formula used in the Training set. Patients in the independent validation set were classified into high-risk and low-risk groups with the same cutoff used in the Training set. Patients in the TCGA set were divided into high-risk and low-risk groups, using the median risk score (1.8100) as the cutoff. P-value were calculated with log-rank test. HR and 95% CI were calculated using the Cox proportional-hazards model. Source data are provided as a Source Data file.

A

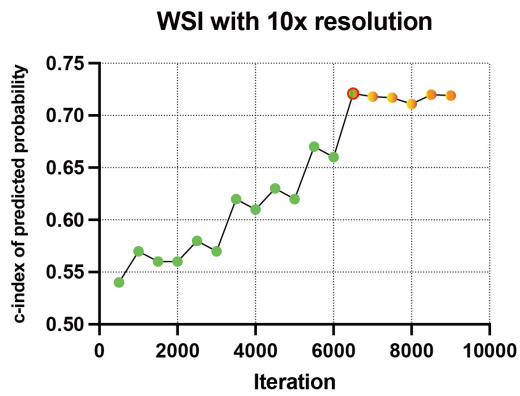

B

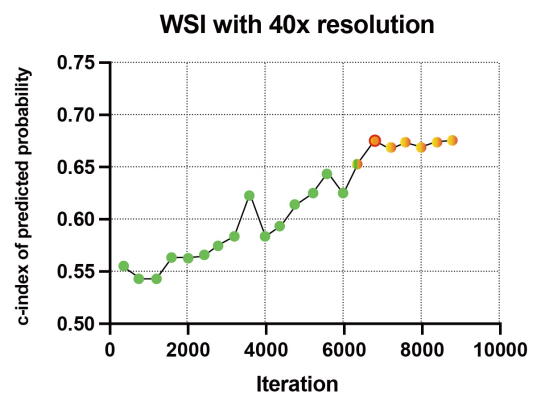

**Supplementary Fig. 4 Selection of the optimal deep learning WSI-based models.** (A) The C-indexes of the candidate deep learning WSI-based models with 10 $\times$  resolution in the tuning set. The red cycle indicates the selected model, yellow points indicate models not selected. The c-indexes of the models from the half of the developing run are shown as green points for comparison. (B) The C-indexes of the candidate deep learning WSI-based models with 40 $\times$  resolution in the tuning set. Source data are provided as a Source Data file.

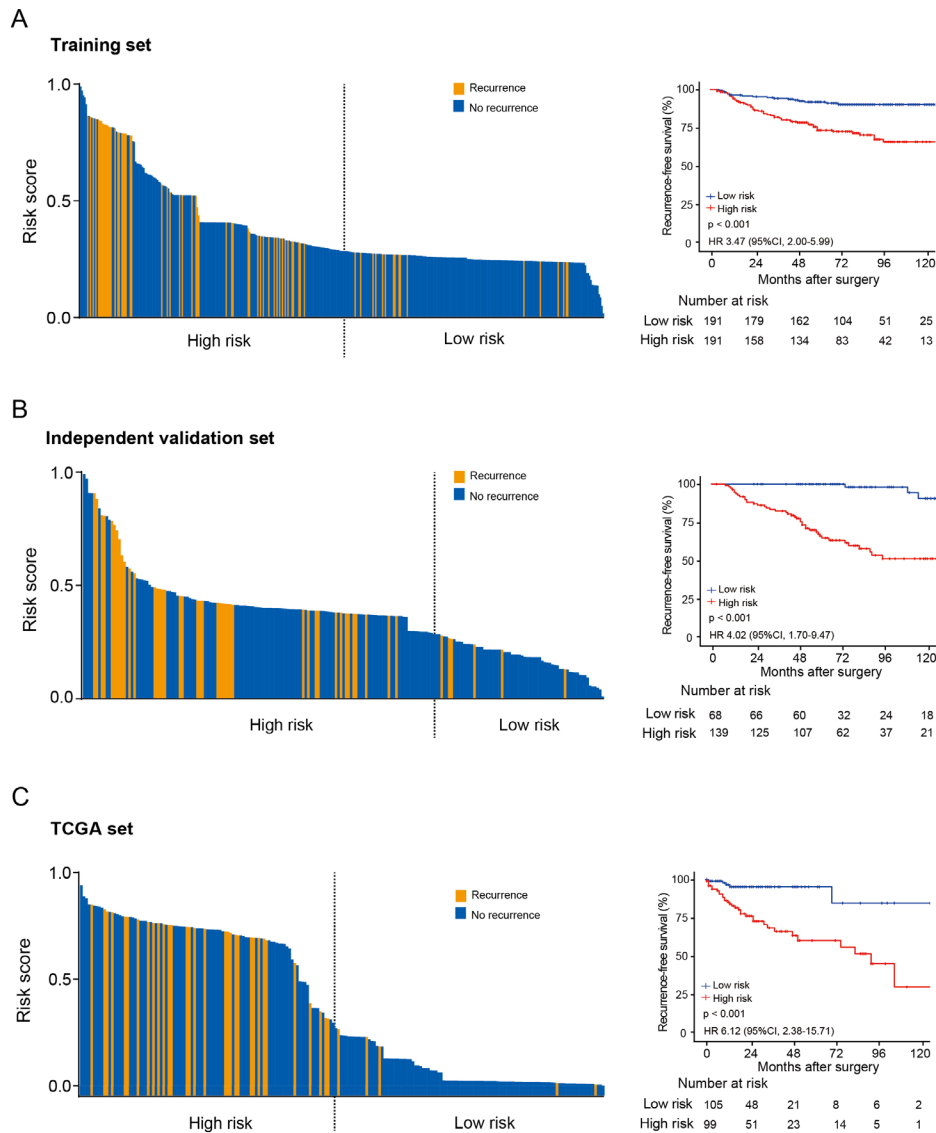

**Supplementary Fig. 5 The risk score calculated by the WSI-based classifier and Kaplan-Meier survival for RFS in the three different sets. (A)** The risk score calculated by the WSI-based classifier and Kaplan-Meier survival in the training set. Patients in the training set were divided into high-risk and low-risk groups, with the median risk score (0.2857) as the cutoff. Left of panel: risk-score distribution of the WSI-based classifier and patient progression status. Right of panel: Kaplan-Meier survival analysis for RFS in pRCC patients who were divided into low-risk and high-risk groups according to WSI-based risk score. **(B, C)** illustrates the risk score calculated by the WSI-based classifier and Kaplan-Meier survival in the independent validation set and TCGA set, respectively. Risk score for each patient in the independent validation set and the TCGA set was both calculated with the same formula used in the training set. Patients in these two sets were also divided into high-risk and low-risk groups using the same cutoff in the training set. P-value were calculated with log-rank test. HR and 95% CI were calculated using the Cox proportional-hazards model. Source data are provided as a Source Data file.

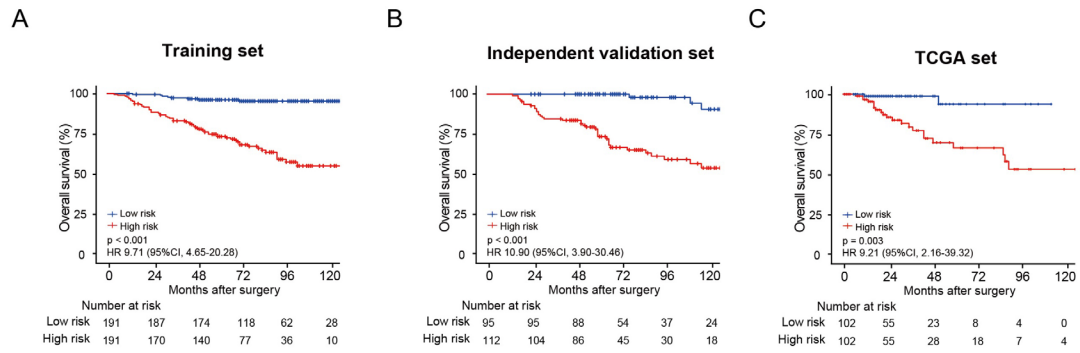

**Supplementary Fig. 6 Kaplan-Meier survival analysis for OS of the multi-classifier system in the three sets.** Patients with pRCC in the training set (A), independent validation set (B) and TCGA set (C) were divided into low-risk and high-risk groups according to multi-classifier system. P-value, HR and 95% CI were computed using the Cox proportional-hazards model. Source data are provided as a Source Data file.

**A. Sex: women**

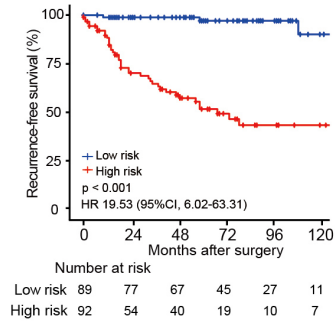

**B. Sex: men**

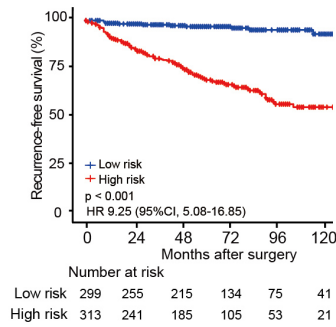

**C. Age: <60 years**

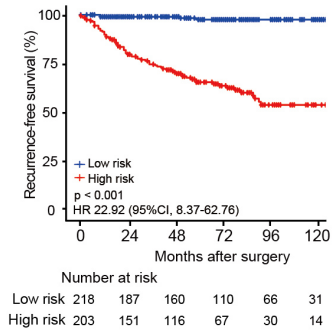

**D. Age: ≥60 years**

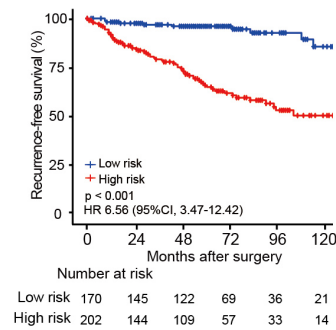

**E. Grade: 1-2**

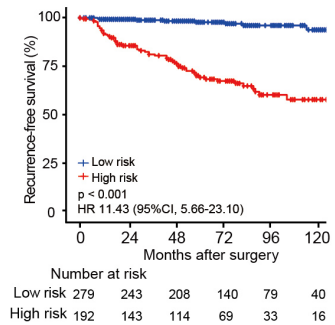

**F. Grade: 3-4**

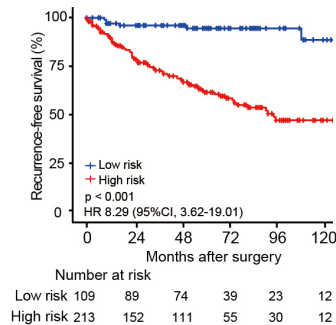

**G. Pathologic stage: I**

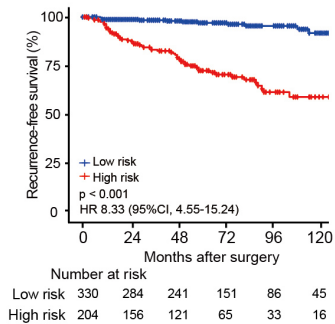

**H. Pathologic stage: II**

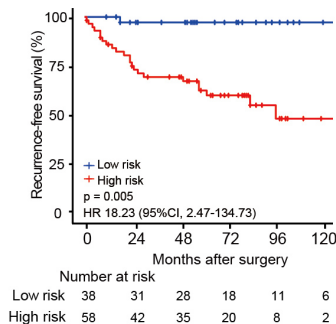

**I. Pathologic stage: III**

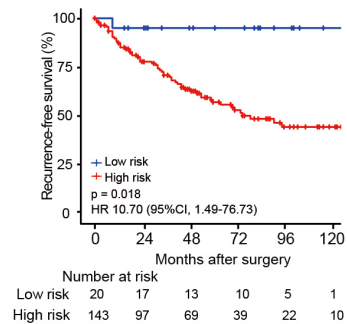



**Supplementary Fig. 7 Kaplan-Meier survival analysis for RFS of the multi-classifier system in different subgroups stratified by clinicopathological risk factors. Sex (A, B), age (C, D), and grade (E, F) and pathologic stage (G-I). P value, HR and 95% CI were calculated using the Cox proportional-hazards model. Source data are provided as a Source Data file.**

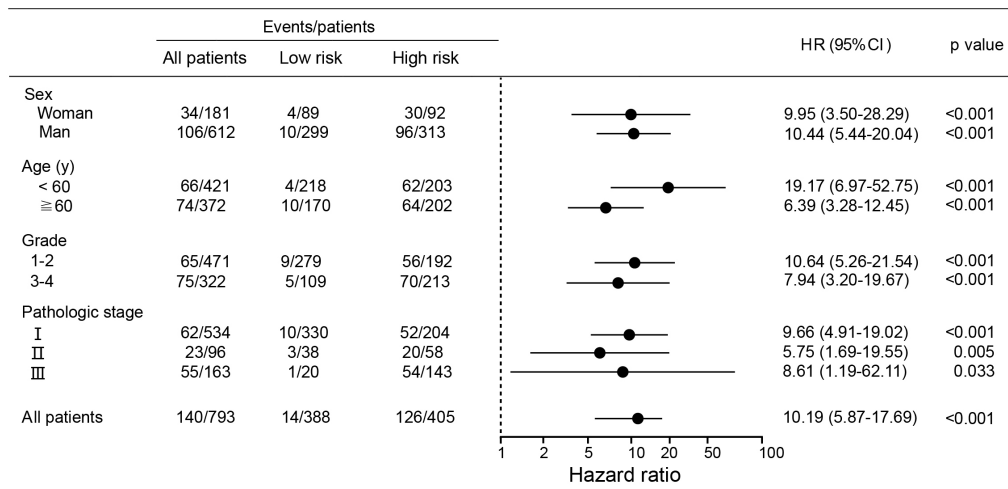

**Supplementary Fig. 8 HR of OS for all 941 patients with pRCC according to the multi-classifier system in different groups stratified by clinical parameters.** HR and 95% CI were computed using the Cox proportional-hazards model. Source data are provided as a Source Data file.

**A. Sex: women**

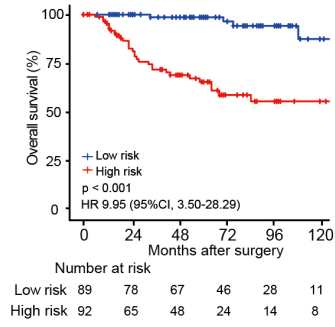

**B. Sex: men**

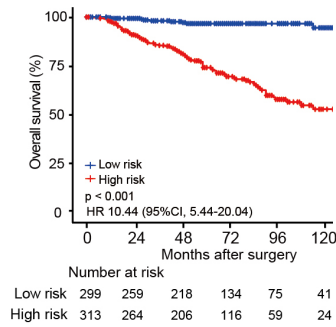

**C. Age: <60 years**

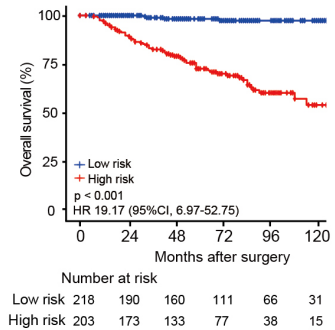

**D. Age: ≥60 years**

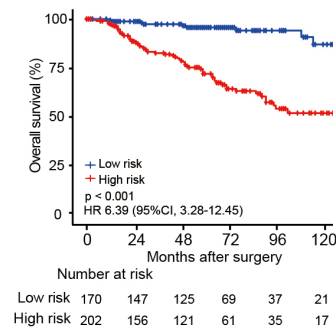

**E. Grade: 1-2**

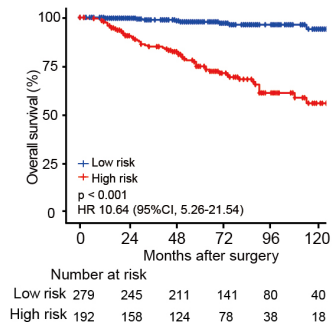

**F. Grade: 3-4**

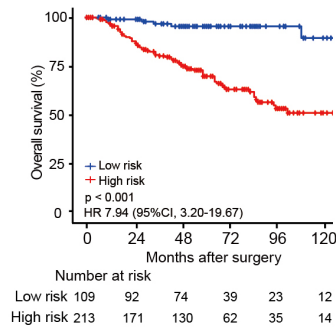

**G. Pathologic stage: I**

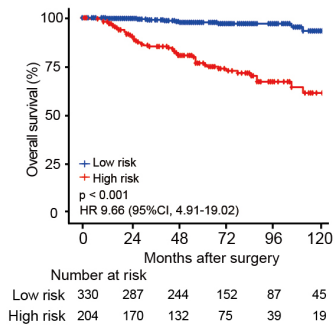

**H. Pathologic stage: II**

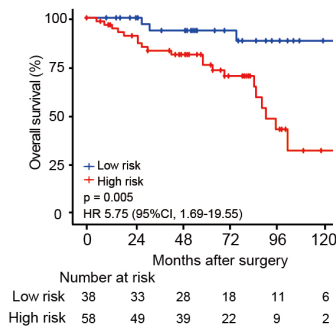

**I. Pathologic stage: III**

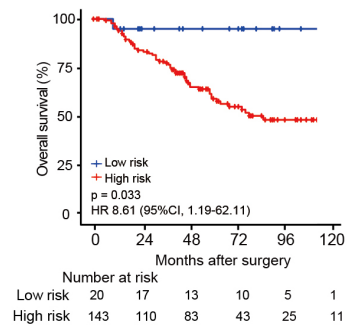

**Supplementary Fig. 9 Kaplan-Meier survival analysis for OS of the multi-classifier system in different subgroups stratified by clinicopathological risk factors.** Sex (A, B), age (C, D), and grade (E, F) and pathologic stage (G-I). P value, HR and 95% CI were calculated using the Cox proportional-hazards model. Source data are provided as a Source Data file.

A

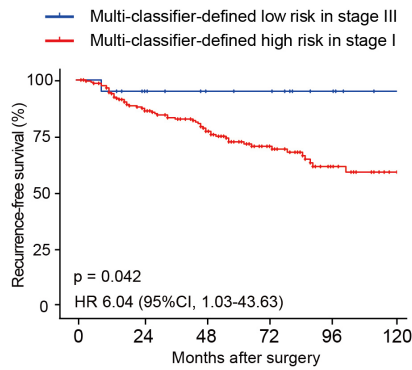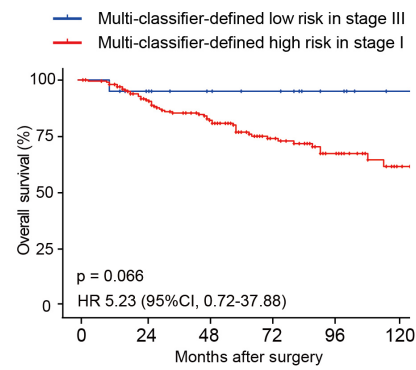

B

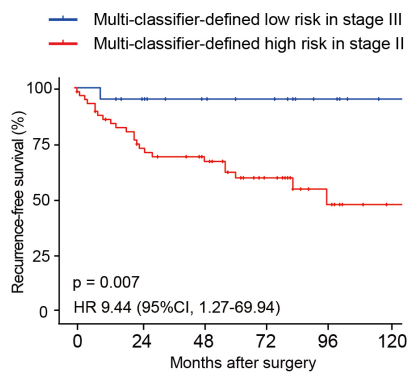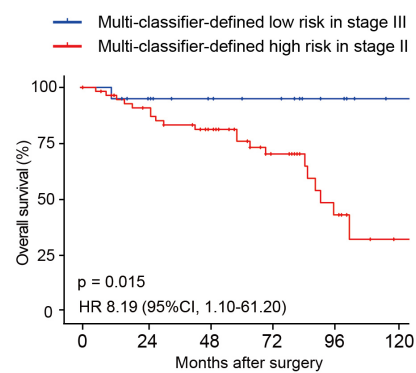

C

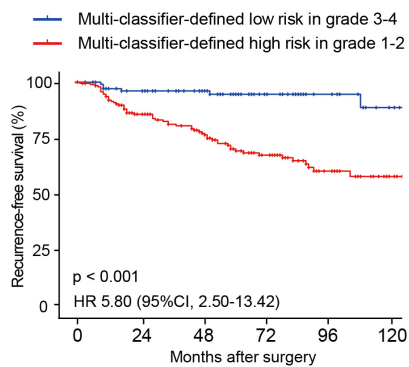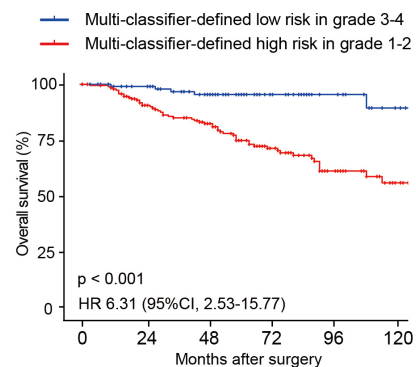

**Supplementary Fig. 10 Kaplan–Meier survival analysis in multi-classifier risk-score-defined low-risk and high-risk patients stratified by stage and grade.** Kaplan-Meier survival analysis for RFS (left) and OS (right) of the multi-classifier risk score in low-risk stage III patients and high-risk stage I patients (A), low-risk stage III patients and high-risk stage II patients (B), low-risk grade 3-4 patients and high-risk grade 1-2 patients (C). HRs and 95% CIs were calculated using the Cox proportional hazards model. Source data are provided as a Source Data file.

**Supplementary Table 1 Information and primers for 40 lncRNAs**

| ID              | Chr   | Start     | End       | Width  | Stand | Gene name      | Forward Primer (5'-3')   | Reverse Primer (5'-3')  |
|-----------------|-------|-----------|-----------|--------|-------|----------------|--------------------------|-------------------------|
| ENSG00000162888 | chr1  | 206491116 | 206497728 | 6613   | -     | C1orf147       | GTCTGCCACTTACTAGCCAT     | ACAACACCTGCCCTATACAGT   |
| ENSG00000172965 | chr2  | 111196350 | 111495100 | 298751 | -     | MIR4435-1HG    | AGAGAATGTCGGGAGAGGAAGT   | AAAAAGCAGCGACCATCCAGT   |
| ENSG00000177133 | chr1  | 3059615   | 3068437   | 8823   | -     | LINC00982      | TGCTCTAGCGCCCACTATT      | ACGAAAGGGGAGAGCAACT     |
| ENSG00000187621 | chr14 | 95650498  | 95679833  | 29336  | +     | TCL6           | AGAGGGGACCATGCAAAAGGA    | ACCTCCCAGCTTCTGTTGT     |
| ENSG00000188242 | chr5  | 466124    | 473098    | 6975   | -     | PP7080         | AGCCACACAAAAGCCTGCAT     | AGGGCTTGCTGCATAGAGGA    |
| ENSG00000203999 | chr20 | 50292720  | 50314922  | 22203  | +     | LINC01270      | CTAACTTGCCTCGAAGACCA     | GACACCTCATCATATGTGCT    |
| ENSG00000213373 | chr17 | 42874670  | 42898704  | 24035  | -     | LINC00671      | GCACCCCAAGGAAGTTTACC     | CAAGGTGGCCTGTTGGAAGG    |
| ENSG00000214922 | chr6  | 29726601  | 29749049  | 22449  | -     | HLA-F-AS1      | ATCAAGTTCCGCTGACCAC      | AGCCATCGAACATATGCC      |
| ENSG00000216560 | chr4  | 3576869   | 3590711   | 13843  | +     | LINC00955      | AGTGAGGGTCCGAGGGATT      | GCCCAACACAGCTCAAGAA     |
| ENSG00000222041 | chr2  | 87455368  | 87606805  | 151438 | +     | CYTOR          | TCGAATATGACAGACACCGAA    | ACAAATGGGAAACCGACCAG    |
| ENSG00000227230 | chr1  | 243135898 | 243140588 | 4691   | +     | RP11-261C10.5  | ACCAGATCGACCGTTGTTCC     | CTCATAAAGGTTTGTCTTCGTC  |
| ENSG00000229005 | chr20 | 44372746  | 44395706  | 22961  | -     | HNF4A-AS1      | CCCAACCACTGACCAAACTCC    | CTGCCGTTGGTATCAGCAAGT   |
| ENSG00000229953 | chr1  | 156646507 | 156661424 | 14918  | -     | RP11-284F21.7  | GGCTGGAACTTAACGCTGTC     | GACTCTGAGAGCAGGGCAAG    |
| ENSG00000231310 | chr3  | 177037405 | 177047923 | 10519  | +     | TBL1XR1-AS1    | TGACAGTGTGCTCTGGACC      | TTTGATGTTCTCCAGTCCACC   |
| ENSG00000231868 | chr1  | 6443034   | 6447006   | 3973   | -     | RP1-20208.2    | TGGGAGCTTGGTCTAAGGTGG    | TCGGCAAGTGTGTTCCAGGTG   |
| ENSG00000233154 | chr1  | 116423724 | 116478842 | 55119  | -     | RP4-655J12.4   | TTCTGTGGGGTCTGACAGT      | GCCATTGCAGATGACCTCGT    |
| ENSG00000234961 | chr10 | 17233325  | 17234833  | 1509   | -     | lnc-TRDMT1-5   | TCAAGTCAAGCGTGCACG       | AGGGTCATAAAATGTGTCAACGG |
| ENSG00000236472 | chr17 | 50135586  | 50146176  | 10591  | +     | AC002401.1     | CTCCGACTCCTCCAGAACC      | TTGATCGTTGTTCTGTGCAT    |
| ENSG00000241224 | chr3  | 109118252 | 109150514 | 32263  | +     | FLJ22763       | CTTTACTCTCTATTGCCTC      | AGCCACTATCTACTTGTG      |
| ENSG00000248323 | chr5  | 91303029  | 91314402  | 11374  | -     | LUCAT1         | AAACATGTGTCAAGCTCGGAT    | TGCCAAGTCCCATAAGAGT     |
| ENSG00000249835 | chr5  | 83531352  | 83581320  | 49969  | -     | VCAN-AS1       | AGAGCTAATGCCACATCACAGC   | AGCCACCAACATATGACAGA    |
| ENSG00000251165 | chr4  | 186286094 | 186500997 | 214904 | -     | F11-AS1        | TTCGCCGTGTACCTTCTCA      | GGGAATGAAGCACAACAGGACA  |
| ENSG00000251194 | chr11 | 35212550  | 35214007  | 1458   | +     | RP1-68D18.2    | CACATGCTTGGCTCATTTC      | GTGTAAGGGGCTTGTCTTGC    |
| ENSG00000251442 | chr4  | 78645903  | 78682699  | 36797  | +     | LINC01094      | TTGTTGGCAGGCACTCCAT      | TGTTGTCTCACCACCAGCAG    |
| ENSG00000255443 | chr11 | 35210343  | 35214985  | 4643   | -     | RP1-68D18.4    | ACTTCGTTGGTAGTCATATTAGGC | CCAAGACACATCCACCCAG     |
| ENSG00000257027 | chr12 | 9658567   | 9662085   | 3519   | +     | RP11-705C15.3  | GATGAGACTTAGCGTGCCTGT    | TCCTCGGGTTCCTCTGTTTA    |
| ENSG00000257139 | chr12 | 70180338  | 70202004  | 21667  | +     | RP11-320P7.2   | GGGACTTAATCCAGCATCCCCTT  | TGAGAAATTCATGATACGCCAT  |
| ENSG00000258017 | chr12 | 49127782  | 49147869  | 20088  | +     | RP11-386G11.10 | ACAAAATAGAACATGGAC       | CACCTAGACTCTATCTTC      |
| ENSG00000261420 | chr6  | 166383189 | 166384824 | 1636   | +     | RP1-168L15.5   | GATCATTAGCACGCGACCCTC    | TGATTACAGGCGTCAGTCAC    |
| ENSG00000261438 | chr10 | 89015836  | 89017059  | 1224   | +     | RP11-399O19.9  | TTCTTCTGCATATTATCCA      | AACTATCTTACCGACATGCTT   |
| ENSG00000261795 | chr7  | 161765    | 164972    | 3208   | -     | RP11-90P13.1   | GTCCAGGCTTAAGCAAACG      | GTCCGAGAAGCACTCAGGTC    |
| ENSG00000265415 | chr17 | 59202677  | 59203829  | 1153   | -     | AC099850.3     | GGTCAGCACAAACCGTAAACAGC  | CCTCCCACCCCTTCGTCT      |
| ENSG00000269974 | chr15 | 30648797  | 30649529  | 733    | +     | RP11-932O9.10  | GTGCCCTGTTGACATTTTC      | TCACAGACTACGTTAAGGACCC  |
| ENSG00000271590 | chr2  | 111210995 | 111212476 | 1482   | -     | RP11-181E10.3  | CATGTTATACCCTTGAATGGC    | CCAAGGGGATACTAGAACCA    |
| ENSG00000273486 | chr3  | 136837338 | 136839021 | 1684   | -     | RP11-731C17.2  | GAACACCCAGGATCAACAGA     | TGGCTCAAGAAGGAGTTCAG    |
| ENSG00000276980 | chr19 | 6716386   | 6717742   | 1357   | -     | CTD-3128G10.7  | AATTGCTTCTCCATCGCCTC     | CTCCTCCATCCTTCTCGCTTC   |
| ENSG00000278898 | chr8  | 134764809 | 134767276 | 2468   | +     | CTD-2342N23.1  | TGAGGCAAAACACCTCTG       | TGGAAGCAGACGCATCAA      |
| ENSG00000279191 | chr2  | 111321433 | 111324812 | 3380   | -     | RP11-803D5.1   | TGGCAAGGGGAATCTGTCAT     | CACAGGTGAAGGAAGGGGAT    |
| ENSG00000280055 | chr8  | 127946559 | 127948723 | 2165   | -     | TMEM75         | ACCTGAGGCCACCTTGTA       | ACAAGCCGTTGAAAGTCCCC    |
| ENSG00000280384 | chr22 | 46163303  | 46165347  | 2045   | +     | RP4-695O20.1   | ACACTGCCTGCTTAGTTGTGG    | GCCTGCTTCCCGCTTATG      |

**Supplementary Table 2 Univariate association of 40 lncRNAs with RFS in the Training set**

| ID              | HR    | 95%CI |       | p value |
|-----------------|-------|-------|-------|---------|
|                 |       | Lower | Upper |         |
| ENSG00000162888 | 0.918 | 0.715 | 1.177 | 0.499   |
| ENSG00000172965 | 0.900 | 0.736 | 1.100 | 0.303   |
| ENSG00000177133 | 0.993 | 0.873 | 1.128 | 0.909   |
| ENSG00000187621 | 0.970 | 0.819 | 1.148 | 0.720   |
| ENSG00000188242 | 0.855 | 0.655 | 1.116 | 0.249   |
| ENSG00000203999 | 1.121 | 0.903 | 1.391 | 0.301   |
| ENSG00000213373 | 0.899 | 0.670 | 1.207 | 0.479   |
| ENSG00000214922 | 1.050 | 0.984 | 1.121 | 0.137   |
| ENSG00000216560 | 1.059 | 0.864 | 1.299 | 0.579   |
| ENSG00000222041 | 1.371 | 1.240 | 1.516 | <0.001  |
| ENSG00000227230 | 1.006 | 0.943 | 1.073 | 0.859   |
| ENSG00000229005 | 1.114 | 0.844 | 1.472 | 0.446   |
| ENSG00000229953 | 0.965 | 0.801 | 1.163 | 0.708   |
| ENSG00000231310 | 0.973 | 0.781 | 1.212 | 0.808   |
| ENSG00000231868 | 0.925 | 0.777 | 1.102 | 0.384   |
| ENSG00000233154 | 0.999 | 0.984 | 1.014 | 0.860   |
| ENSG00000234961 | 1.578 | 1.237 | 2.012 | 0.002   |
| ENSG00000236472 | 1.038 | 0.985 | 1.094 | 0.168   |
| ENSG00000241224 | 0.995 | 0.981 | 1.010 | 0.501   |
| ENSG00000248323 | 1.448 | 1.304 | 1.607 | <0.001  |
| ENSG00000249835 | 0.964 | 0.849 | 1.094 | 0.570   |
| ENSG00000251165 | 1.111 | 0.932 | 1.324 | 0.242   |
| ENSG00000251194 | 0.974 | 0.859 | 1.106 | 0.688   |
| ENSG00000251442 | 0.852 | 0.635 | 1.143 | 0.284   |
| ENSG00000255443 | 0.886 | 0.632 | 1.242 | 0.483   |
| ENSG00000257027 | 1.080 | 0.893 | 1.307 | 0.428   |
| ENSG00000257139 | 0.911 | 0.691 | 1.201 | 0.508   |
| ENSG00000258017 | 0.914 | 0.754 | 1.108 | 0.360   |
| ENSG00000261420 | 0.895 | 0.688 | 1.165 | 0.410   |
| ENSG00000261438 | 1.007 | 0.788 | 1.288 | 0.956   |
| ENSG00000261795 | 0.971 | 0.720 | 1.308 | 0.845   |
| ENSG00000265415 | 1.486 | 1.112 | 1.985 | 0.007   |
| ENSG00000269974 | 1.085 | 0.967 | 1.217 | 0.166   |
| ENSG00000271590 | 0.931 | 0.782 | 1.109 | 0.423   |
| ENSG00000273486 | 0.848 | 0.645 | 1.115 | 0.238   |
| ENSG00000276980 | 0.992 | 0.737 | 1.335 | 0.955   |
| ENSG00000278898 | 0.893 | 0.658 | 1.212 | 0.468   |
| ENSG00000279191 | 0.982 | 0.927 | 1.040 | 0.528   |
| ENSG00000280055 | 0.952 | 0.731 | 1.239 | 0.713   |
| ENSG00000280384 | 0.842 | 0.614 | 1.153 | 0.283   |

HRs, 95% CIs and two-sided P values were calculated using the Cox proportional hazards model. Source data are provided as a Source Data file.

**Supplementary Table 3 Univariate and multivariate Cox regression analysis of clinicopathological factors with RFS in the training set**

|                                      | Univariate analysis |         | Multivariate analysis |         |
|--------------------------------------|---------------------|---------|-----------------------|---------|
|                                      | HR (95%CI)          | p value | HR (95%CI)            | p value |
| Sex (woman vs man)                   | 1.14 (0.66-1.97)    | 0.640   | 1.10 (0.63-1.91)      | 0.741   |
| Age ( $\geq$ 60 years vs < 60 years) | 1.32 (0.82-2.11)    | 0.256   | 1.40 (0.87-2.26)      | 0.168   |
| Grade (4 vs 3 vs 2 vs 1)             | 1.98 (1.34-2.92)    | <0.001  | 1.76 (1.17-2.63)      | 0.006   |
| Pathologic stage (III vs II vs I)    | 3.26 (1.95-5.47)    | <0.001  | 2.98 (1.76-5.04)      | <0.001  |

HR=hazard ratio; CI=confidence interval; WHO=World Health Organization; ISUP=International Society of Urological Pathology. HRs, 95% CIs and two-sided P values were calculated using the Cox proportional hazards model. Source data are provided as a Source Data file.



**Supplementary Table 4 Univariate Cox regression analysis of the multi-classifier system with RFS in the three sets**

|                                                 | Training set (n=382) |         | Independent validation set (n=207) |         | TCGA set (n=204)  |         |
|-------------------------------------------------|----------------------|---------|------------------------------------|---------|-------------------|---------|
|                                                 | HR (95%CI)           | p value | HR (95% CI)                        | p value | HR (95% CI)       | p value |
| Sex (woman vs man)                              | 1.14 (0.66-1.97)     | 0.640   | 1.52 (0.81-2.83)                   | 0.189   | 2.05 (1.02-4.12)  | 0.044   |
| Age ( $\geq$ 60 years vs < 60 years)            | 1.32 (0.82-2.11)     | 0.256   | 1.44 (0.81-2.55)                   | 0.211   | 0.83 (0.43-1.59)  | 0.571   |
| Grade (4 vs 3 vs 2 vs 1)                        | 1.98 (1.34-2.92)     | <0.001  | 2.08 (1.30-3.35)                   | 0.002   | 2.04 (1.14-3.65)  | 0.016   |
| Pathologic stage (III vs II vs I)               | 3.26 (1.95-5.47)     | <0.001  | 2.66 (1.41-5.01)                   | 0.003   | 6.90 (3.36-14.18) | <0.001  |
| Multi-classifier system (High risk vs Low risk) | 11.17 (5.11-24.40)   | <0.001  | 12.85 (4.61-35.84)                 | <0.001  | 8.54 (3.02-24.14) | <0.001  |

TCGA=The Cancer Genome Atlas; HR=hazard ratio; CI=confidence interval. HRs, 95% CIs and two-sided P values were calculated using the Cox proportional hazards model. Source data are provided as a Source Data file.

**Supplementary Table 5 Univariate Cox regression analysis of the multi-classifier system with OS in the three sets**

|                                                 | Training set (n=382) |         | Independent validation set (n=207) |         | TCGA set (n=204)  |         |
|-------------------------------------------------|----------------------|---------|------------------------------------|---------|-------------------|---------|
|                                                 | HR (95%CI)           | p value | HR (95% CI)                        | p value | HR (95% CI)       | p value |
| Sex (woman vs man)                              | 1.01 (0.58-1.77)     | 0.964   | 1.22 (0.63-2.37)                   | 0.552   | 1.55 (0.61-3.95)  | 0.359   |
| Age ( $\geq$ 60 years vs < 60 years)            | 1.39 (0.87-2.21)     | 0.170   | 1.63 (0.90-2.93)                   | 0.106   | 1.01 (0.44-2.31)  | 0.988   |
| Grade (4 vs 3 vs 2 vs 1)                        | 2.80 (1.27-6.19)     | 0.011   | 3.88 (1.33-11.29)                  | 0.013   | 3.46 (0.78-15.24) | 0.101   |
| Pathologic stage (III vs II vs I)               | 3.27 (1.96-5.44)     | <0.001  | 2.22 (1.16-4.28)                   | 0.017   | 8.40 (3.25-21.74) | <0.001  |
| Multi-classifier system (High risk vs Low risk) | 9.71 (4.65-20.28)    | <0.001  | 10.90 (3.90-30.46)                 | <0.001  | 9.21 (2.16-39.32) | 0.003   |

TCGA=The Cancer Genome Atlas; HR=hazard ratio; CI=confidence interval. HRs, 95% CIs and two-sided P values were calculated using the Cox proportional hazards model. Source data are provided as a Source Data file.

**Supplementary Table 6 Multivariate Cox regression analysis of the multi-classifier system with RFS in the three sets**

|                                                 | Training set (n=382) |         | Independent validation set (n=207) |         | TCGA set (n=204)  |         |
|-------------------------------------------------|----------------------|---------|------------------------------------|---------|-------------------|---------|
|                                                 | HR (95%CI)           | p value | HR (95% CI)                        | p value | HR (95% CI)       | p value |
| Sex (woman vs man)                              | 1.26 (0.72-2.21)     | 0.417   | 2.05 (1.05-4.00)                   | 0.034   | 1.88 (0.92-3.82)  | 0.081   |
| Age ( $\geq$ 60 years vs < 60 years)            | 1.30 (0.80-2.10)     | 0.283   | 1.17 (0.65-2.11)                   | 0.591   | 0.61 (0.31-1.20)  | 0.152   |
| Grade (4 vs 3 vs 2 vs 1)                        | 1.20 (0.79-1.82)     | 0.399   | 1.56 (0.90-2.69)                   | 0.110   | 1.38 (0.73-2.62)  | 0.319   |
| Pathologic stage (III vs II vs I)               | 1.52 (0.89-2.60)     | 0.126   | 0.79 (0.39-1.57)                   | 0.496   | 3.57 (1.64-7.79)  | 0.001   |
| Multi-classifier system (High risk vs Low risk) | 9.01 (3.95-20.55)    | <0.001  | 13.78 (4.75-39.95)                 | <0.001  | 5.68 (1.93-16.73) | 0.002   |

TCGA=The Cancer Genome Atlas; HR=hazard ratio; CI=confidence interval. HRs, 95% CIs and two-sided P values were calculated using the Cox proportional hazards model. Source data are provided as a Source Data file.

**Supplementary Table 7 Multivariate Cox regression analysis of the multi-classifier system with OS in the three sets**

|                                                 | Training set (n=382) |         | Independent validation set (n=207) |         | TCGA set (n=204)  |         |
|-------------------------------------------------|----------------------|---------|------------------------------------|---------|-------------------|---------|
|                                                 | HR (95%CI)           | p value | HR (95% CI)                        | p value | HR (95% CI)       | p value |
| Sex (woman vs man)                              | 1.17 (0.67-2.06)     | 0.585   | 1.44 (0.71-2.91)                   | 0.308   | 1.34 (0.52-3.46)  | 0.543   |
| Age ( $\geq$ 60 years vs < 60 years)            | 1.31 (0.82-2.11)     | 0.256   | 1.37 (0.75-2.50)                   | 0.312   | 0.93 (0.40-2.15)  | 0.863   |
| Grade (4 vs 3 vs 2 vs 1)                        | 0.92 (0.62-1.39)     | 0.706   | 1.62 (0.92-2.88)                   | 0.097   | 1.07 (0.50-2.29)  | 0.871   |
| Pathologic stage (III vs II vs I)               | 1.59 (0.93-2.70)     | 0.088   | 0.69 (0.33-1.44)                   | 0.320   | 5.04 (1.76-14.40) | 0.003   |
| Multi-classifier system (High risk vs Low risk) | 8.51 (3.90-18.55)    | <0.001  | 11.11 (3.85-32.05)                 | <0.001  | 5.08 (1.13-22.79) | 0.034   |

TCGA=The Cancer Genome Atlas; HR=hazard ratio; CI=confidence interval. HRs, 95% CIs and two-sided P values were calculated using the Cox proportional hazards model. Source data are provided as a Source Data file.
